# Supplementary material for: Physically cross-linked pH-responsive hydrogels with tunable formulations for controlled drug delivery
Source: Royal Society of Chemistry journal article supplement (doi:10.1039/c5ra07424j), 2015-01-01
Supplement: c5ra07424j1.pdf [file c5ra07424j1.pdf]

## Physically cross-linked pH-responsive hydrogels with tunable formulations for controlled drug delivery

Deepa Suhag,<sup>‡a</sup> Rohan Bhatia,<sup>‡a</sup> Souvik Das,<sup>‡a</sup> Adeeba Shakeel,<sup>‡a</sup> Abhisek Ghosh,<sup>‡b</sup> Anirudha Singh,<sup>c</sup> O. P. Sinha,<sup>d</sup> Sandip Chakrabarti<sup>\*d</sup> and Monalisa Mukherjee<sup>\*a</sup>

<sup>a</sup> Biomimetic and Nanostructured Materials Research Laboratory, Amity Institute of Biotechnology, Amity University Uttar Pradesh, Sector-125, Noida, India

**E-mail:** mmukherjee@amity.edu

<sup>b</sup> Centre for Biomedical Engineering, Indian Institute of Technology Delhi, New Delhi 110016, India

<sup>c</sup> Faculty of Translational Tissue Engineering Centre & Dept. of Urology, Johns Hopkins School of Medicine, Baltimore, USA

<sup>d</sup> Amity Institute of Nanotechnology, Amity University Uttar Pradesh, Sector-125, Noida, India

**E-mail:** schakrabarti@amity.edu

<sup>‡</sup> These authors contributed equally to this work

### ESI 1 Feed Composition of PAD Hydrogels

| Sample Code | AAc (mol %) | DMAEMA (mol %) | Water (mol %)* |
|-------------|-------------|----------------|----------------|
| PAD50       | 50          | 50             | 1000           |
| PAD70       | 70          | 30             | 380            |
| PAD80       | 80          | 20             | 380            |
| PAD90       | 90          | 10             | 440            |

Note: SPS = 0.025 mole % and TEMED = 0.3 mole %; \*mol % to total monomer content

**ESI 2** Diffusion Exponents (n) and Diffusion Constants (K) of PAD Hydrogels during swelling in buffer solutions of pH 1.2 and 7

| Sample code | Diffusion Parameters |      |                |                     |      |                |
|-------------|----------------------|------|----------------|---------------------|------|----------------|
|             | pH 1.2               |      |                | pH 7.0              |      |                |
|             | K x 10 <sup>3</sup>  | n    | R <sup>2</sup> | K x 10 <sup>3</sup> | n    | R <sup>2</sup> |
| PAD70       | 14.3                 | 0.34 | 0.98           | 3.2                 | 0.43 | 0.98           |
| PAD80       | 27.4                 | 0.29 | 0.98           | 2.1                 | 0.42 | 0.93           |
| PAD90       | 190.1                | 0.13 | 0.97           | 92.1                | 0.05 | 0.93           |

**ESI 3** In-vitro BSA release behavior of PAD hydrogels.

| Sample code | Cumulative release (%) of BSA in |          |            |           |
|-------------|----------------------------------|----------|------------|-----------|
|             | pH 1.2                           |          | pH 7.4     |           |
|             | mg/g                             | %        | mg/g       | %         |
| PAD70       | 15.0± 2.9                        | 5.5 ±0.3 | 200.0 ±13  | 73.1 ±2.6 |
| PAD80       | 30.5± 4.2                        | 3.7 ±0.5 | 270.0 ±9.4 | 32.7 ±1.9 |
| PAD90       | 50.5± 7.0                        | 4.1 ±0.8 | 310.7± 13  | 25.3± 2.6 |
